# Supplementary material for: Clinical Implication of Inflammation-Based Prognostic Score in Pancreatic Cancer: Glasgow Prognostic Score Is the Most Reliable Parameter
Source: PubMed Central journal article supplement (PMC4863804; doi:10.1097/md.0000000000003582), 2016-05-06
Supplement: medi-95-e3582-s001.pdf [file medi-95-e3582-s001.pdf]

**Supplementary TABLE 1. Inflammation-based prognostic score**

| <b>Scoring system</b>                                                                                   | <b>Score</b> |
|---------------------------------------------------------------------------------------------------------|--------------|
| <b>Glasgow prognostic score (GPS)</b>                                                                   |              |
| CRP ( $\leq 1.0$ mg/l) and albumin ( $\geq 3.5$ g/dl)                                                   | 0            |
| CRP ( $\leq 1.0$ mg/l) and albumin ( $< 3.5$ g/dl)                                                      | 1            |
| CRP ( $> 1.0$ mg/l) and albumin ( $\geq 3.5$ g/dl)                                                      | 1            |
| CRP ( $> 1.0$ mg/l) and albumin ( $< 3.5$ g/dl)                                                         | 2            |
| <b>modified GPS</b>                                                                                     |              |
| CRP ( $\leq 1.0$ mg/l) and albumin ( $\geq 3.5$ g/dl)                                                   | 0            |
| CRP ( $\leq 1.0$ mg/l) and albumin ( $< 3.5$ g/dl)                                                      | 0            |
| CRP ( $> 1.0$ mg/l)                                                                                     | 1            |
| CRP ( $> 1.0$ mg/l) and albumin ( $< 3.5$ g/dl)                                                         | 2            |
| <b>Neutrophil lymphocyte ratio (NLR)</b>                                                                |              |
| Neutrophil count:lymphocyte count $< 3:1$                                                               | 0            |
| Neutrophil count:lymphocyte count $\geq 3:1$                                                            | 1            |
| <b>Platelet lymphocyte ratio (PLR)</b>                                                                  |              |
| Platelet count:lymphocyte count $< 150:1$                                                               | 0            |
| Platelet count:lymphocyte count $\geq 150:1$                                                            | 1            |
| <b>Prognostic index (PI)</b>                                                                            |              |
| CRP ( $\leq 1.0$ mg/l) and white cell count ( $\leq 11,000/\mu\text{l}$ )                               | 0            |
| CRP ( $\leq 1.0$ mg/l) and white cell count ( $> 11,000/\mu\text{l}$ )                                  | 1            |
| CRP ( $> 1.0$ mg/l) and white cell count ( $\leq 11,000/\mu\text{l}$ )                                  | 1            |
| CRP ( $> 1.0$ mg/l) and white cell count ( $> 11,000/\mu\text{l}$ )                                     | 2            |
| <b>Prognostic nutritional index (PNI)</b>                                                               |              |
| $10 \times \text{Albumin (g/dl)} + 0.005 \times \text{total lymphocyte count } (/ \mu\text{l}) \geq 45$ | 0            |
| $10 \times \text{Albumin (g/dl)} + 0.005 \times \text{total lymphocyte count } (/ \mu\text{l}) < 45$    | 1            |

CRP; C-reactive prote
